# Supplementary material for: B7-H3 Chimeric Antigen Receptor Redirected T Cells Target Anaplastic Lymphoma Kinase-Positive Anaplastic Large Cell Lymphoma
Source: PubMed Central journal article supplement (PMC7766167; doi:10.3390/cancers12123815), 2020-12-17

# Supplementary Materials: B7-H3 Chimeric Antigen Receptor Redirected T Cells Target Anaplastic Lymphoma Kinase-Positive Anaplastic Large Cell Lymphoma

Zhenguo Zi, Haihong Zhao, Huanyu Wang, Xiaojing Ma and Fang Wei

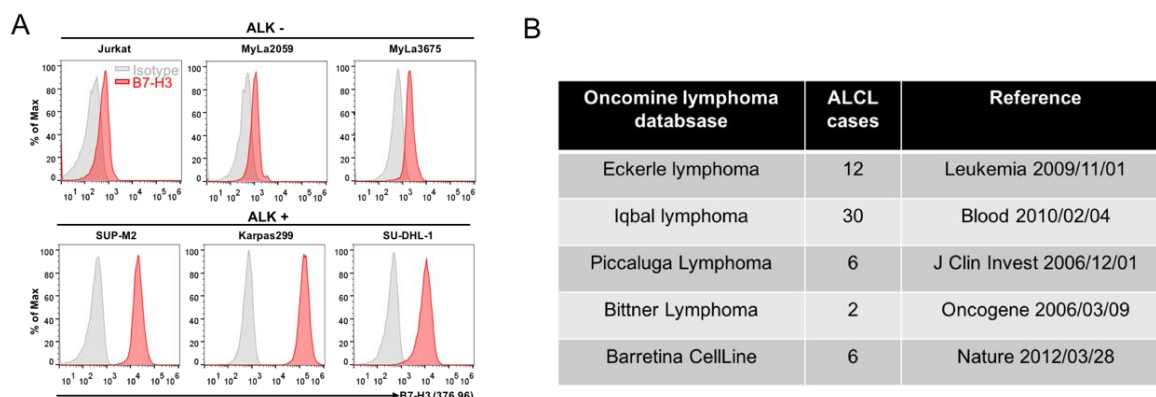

**Figure S1.** The expression of B7-H3 in T cell lymphoma cell lines and ALCL clinical cases. A. Intracellular B7-H3 protein level was evaluated by flow cytometry analysis; B. The ALCL cases of total lymphoma database in OncoPrint and related references.

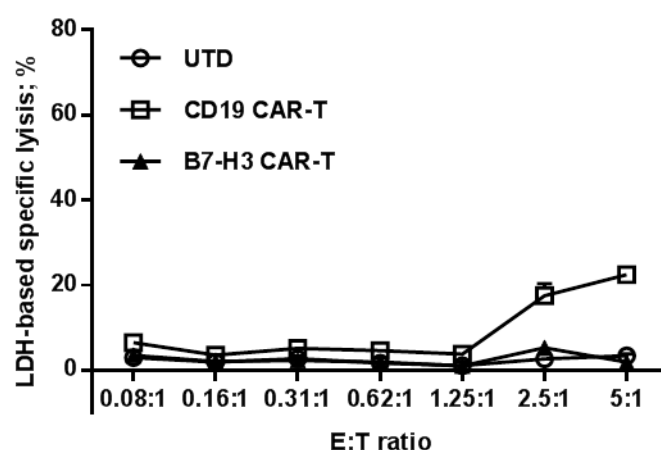

**Figure S2.** B7-H3 T cell effects on B7-H3-expressing Jurkat cells. CD19 CAR-T and B7-H3 CAR-T cells were normalized to the same expression efficiency. Jurkat cells were co-cultured with UTD, CD19 CAR-T or B7-H3 CAR-T cells in indicated E: T ratios for 6 hours. The percentage (%) release of LDH was calculated as killing efficiency of effector T cells.

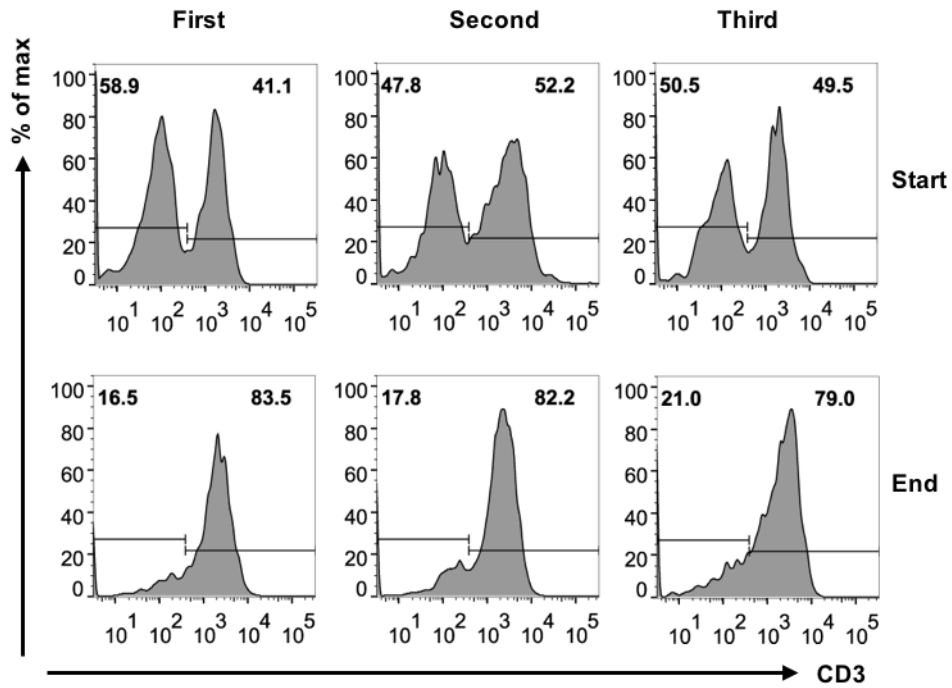

**Figure S3.** FACS staining of CD3 expression before and after each round of stimulation. B7-H3 CAR-T cells were co-cultured with SUP-M2 cell lines at an E: T ratio of 1:1. After every 3 days, CAR-T cells were counted by CD3 FACS staining, and the same number of CAR-T cells are re-plated on a new batch of SUP-M2 cells. The process was repeated for 2 more stimulations.

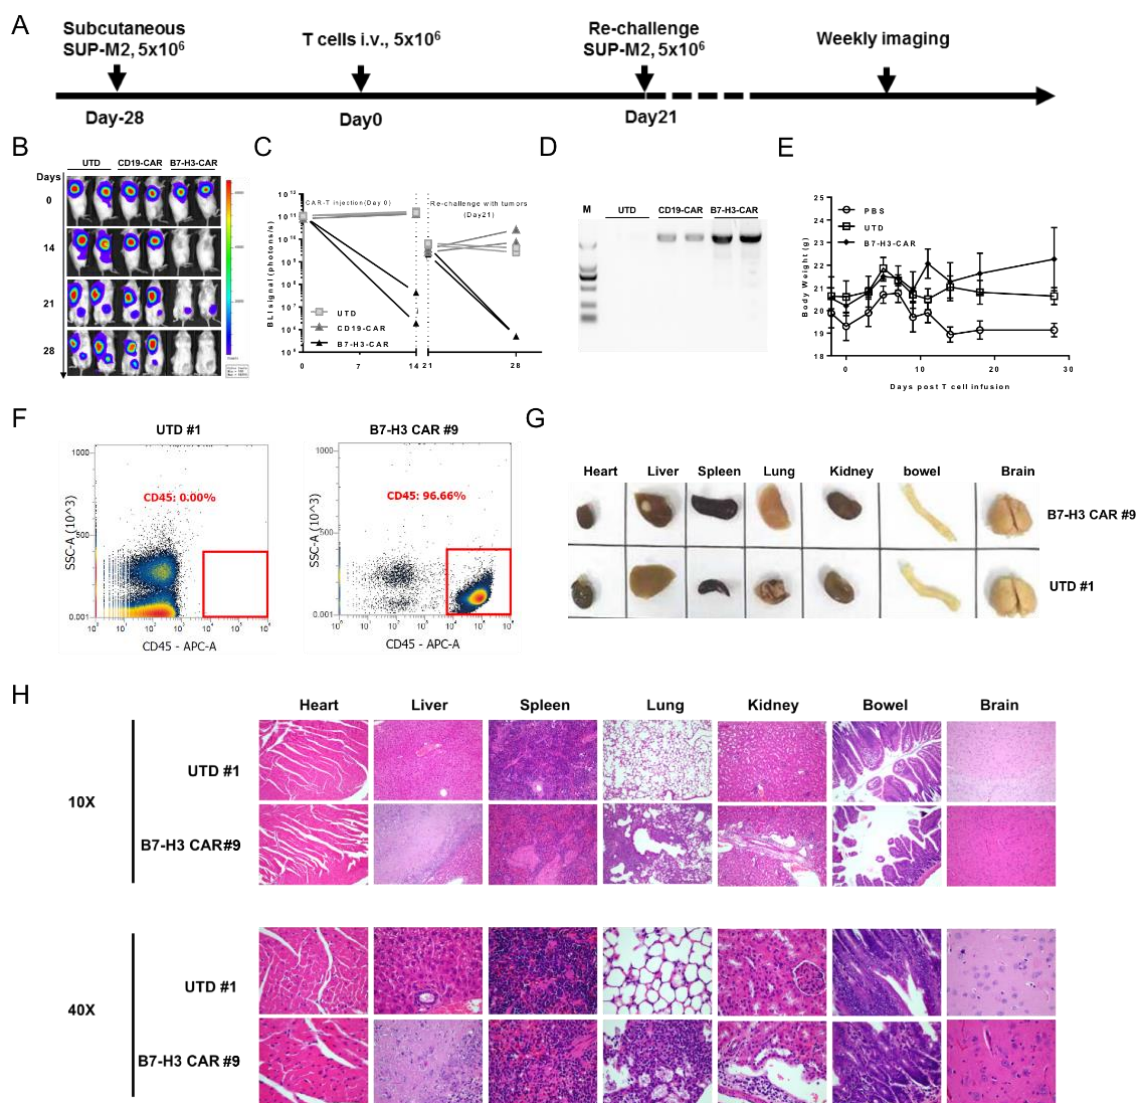

**Figure S4.** In vivo model of B7-H3 CAR-T function, occupancy and autopsy in mouse. (A) The schematic diagram shows the workflow of the SUP-M2 xenograft re-challenge model in which mice were re-challenged with tumor cells at days 21 after infused with B7-H3 CAR-T, CD19 T and UTD cells. (B) Tumor killing capacity of B7-H3 CAR T cells in NOG mice with a SUP-M2-Luc xenograft model shown in A. (C) Bioluminescence kinetics of SUP-M2-Luc tumor growth in the re-challenge model shown in (A). (D) Genome CAR elements of infused T cells were monitored by PCR in blood sample through orbit after T cells administration on day 7. (E) Body weight of mice in Figure 5 were measured every two or three days after PBS, UTD and B7-H3 CAR-T cell infusion (3 mice/group). (F) The phenotyping of PBMCs collected from mouse #9 in Figure 5 which was infused with B7-H3 CAR T cells for 30 days. Human T lymphocytes were gated by hCD45. (G) Autopsy of mouse #9 (in Figure 5) multiple tissues including heart, liver spleen, lung, kidney, bowel and brain. (H) Hematoxylin and eosin staining of autopsy collected tissues of mouse #9 (in Figure 5).

**Publisher's Note:** MDPI stays neutral with regard to jurisdictional claims in published maps and institutional affiliations.

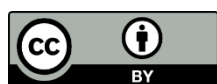

Supplement: cancers-12-03815-s001.pdf [file cancers-12-03815-s001.pdf]
